# Supplementary material for: Photoinduced charge separation in donor–acceptor spiro compounds at metal and metal oxide surfaces: application in dye-sensitized solar cell
Source: Royal Society of Chemistry journal article supplement (doi:10.1039/c2ra00995a), 2012-01-01
Supplement: c2ra00995a.pdf [file c2ra00995a.pdf]

## Electronic Supplementary Information

# Photoinduced charge separation in donor-acceptor spiro compounds at metal and metal oxide surfaces. Application in Dye Sensitized Solar Cell

**Lorena Macor,<sup>a</sup> Miguel Gervaldo,<sup>a</sup> Fernando Fungo,<sup>\*a</sup> Luis Otero,<sup>\*a</sup> Thomas  
Dittrich,<sup>b</sup> Chih-Yen Lin,<sup>c</sup> Liang-Chen Chi,<sup>c</sup> Fu-Chuan Fang,<sup>c</sup> Shu-Woei Lii,<sup>c</sup>  
Ken-Tsung Wong,<sup>\*c</sup> Chih-Hung Tsai,<sup>d</sup> Chung-Chih Wu.<sup>d</sup>**

<sup>a</sup> *Departamento de Química, Universidad Nacional de Río Cuarto, Agencia Postal N° 3, X5804BYA, Río Cuarto, Argentina.*

<sup>b</sup> *Helmholtz Center Berlin for Materials and Energy, Institute of Heterogeneous Materials, Hahn-Meitner-Platz 1, D-14109 Berlin, Germany.*

<sup>c</sup> *Department of Chemistry, National Taiwan University, Taipei 106, Taiwan.*

<sup>d</sup> *Department of Electrical Engineering, Graduate Institute of Photonics and Optoelectronics, and Graduate Institute of Electronics Engineering, National Taiwan University, Taipei 10617, Taiwan.*

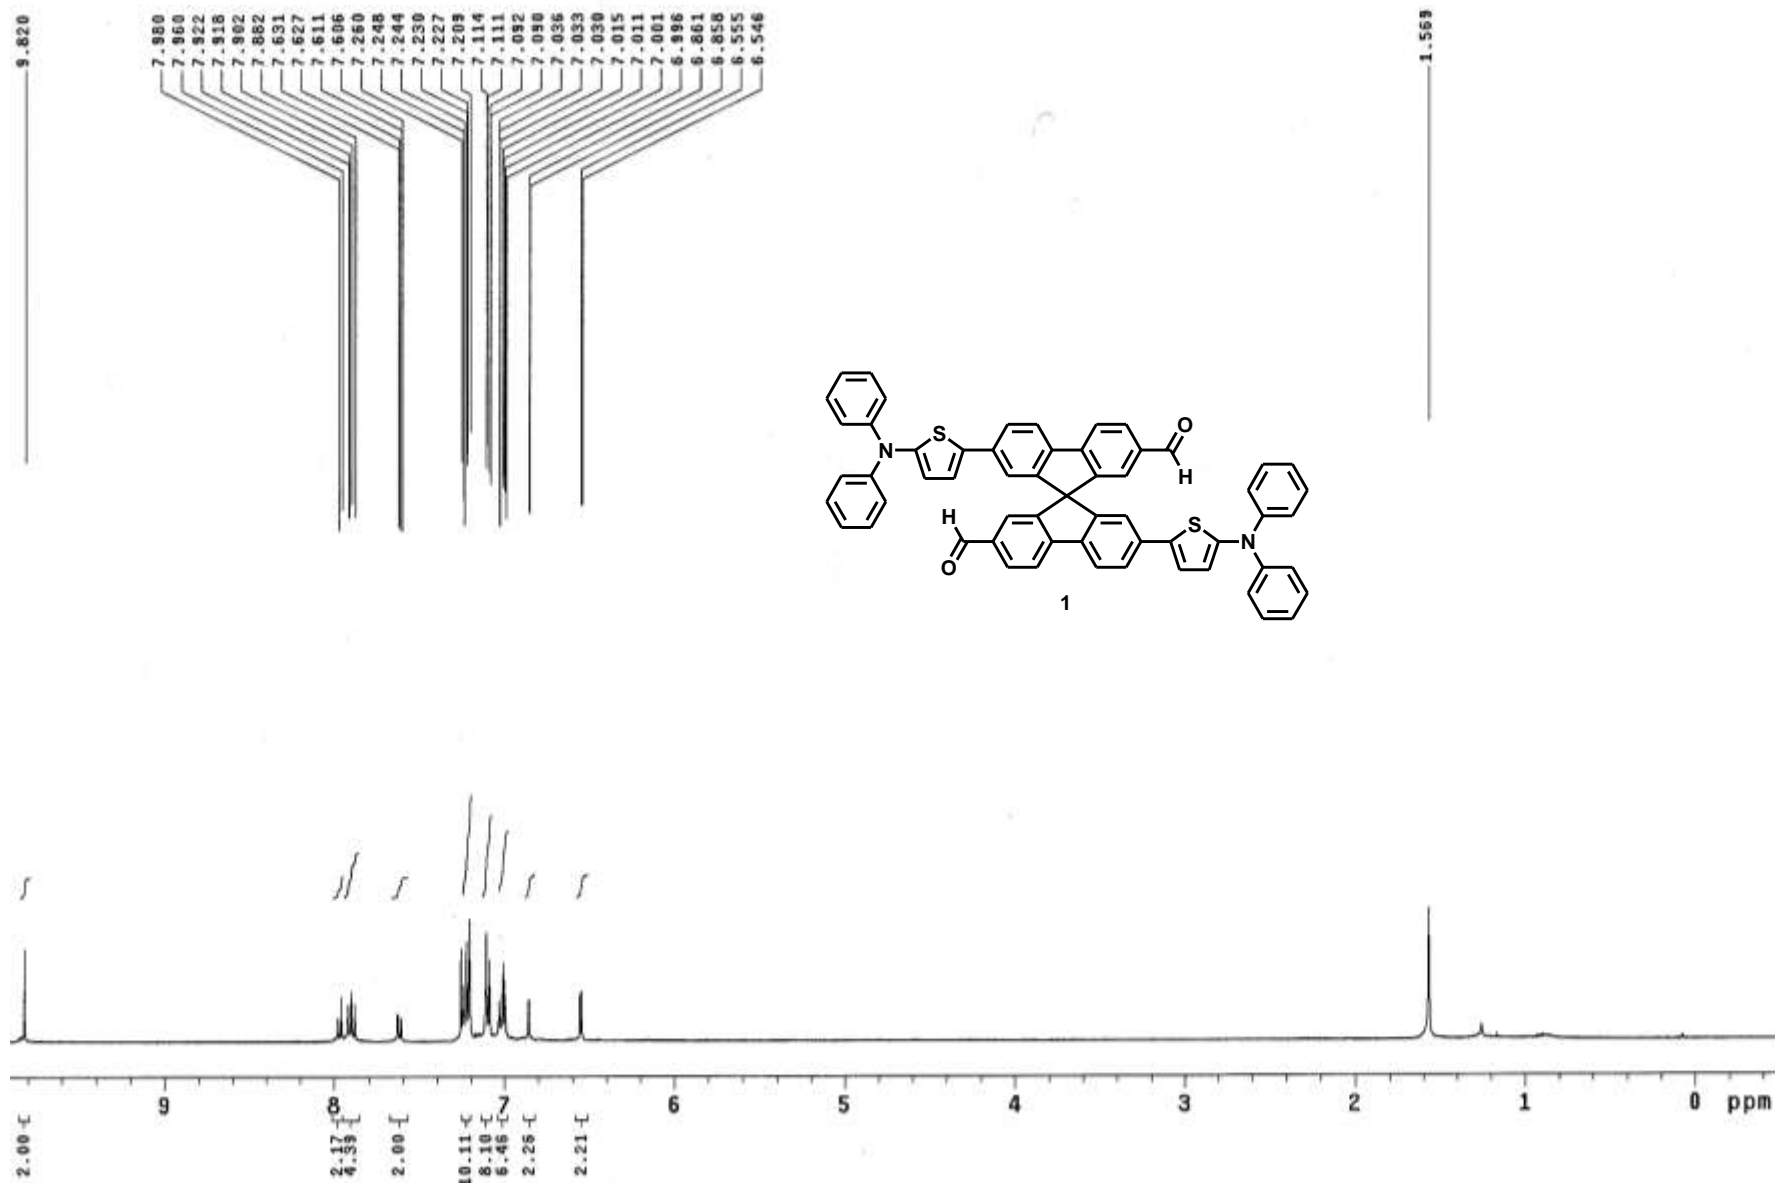

Figure 1a: <sup>1</sup>H NMR Spectrum of precursor compound 1.

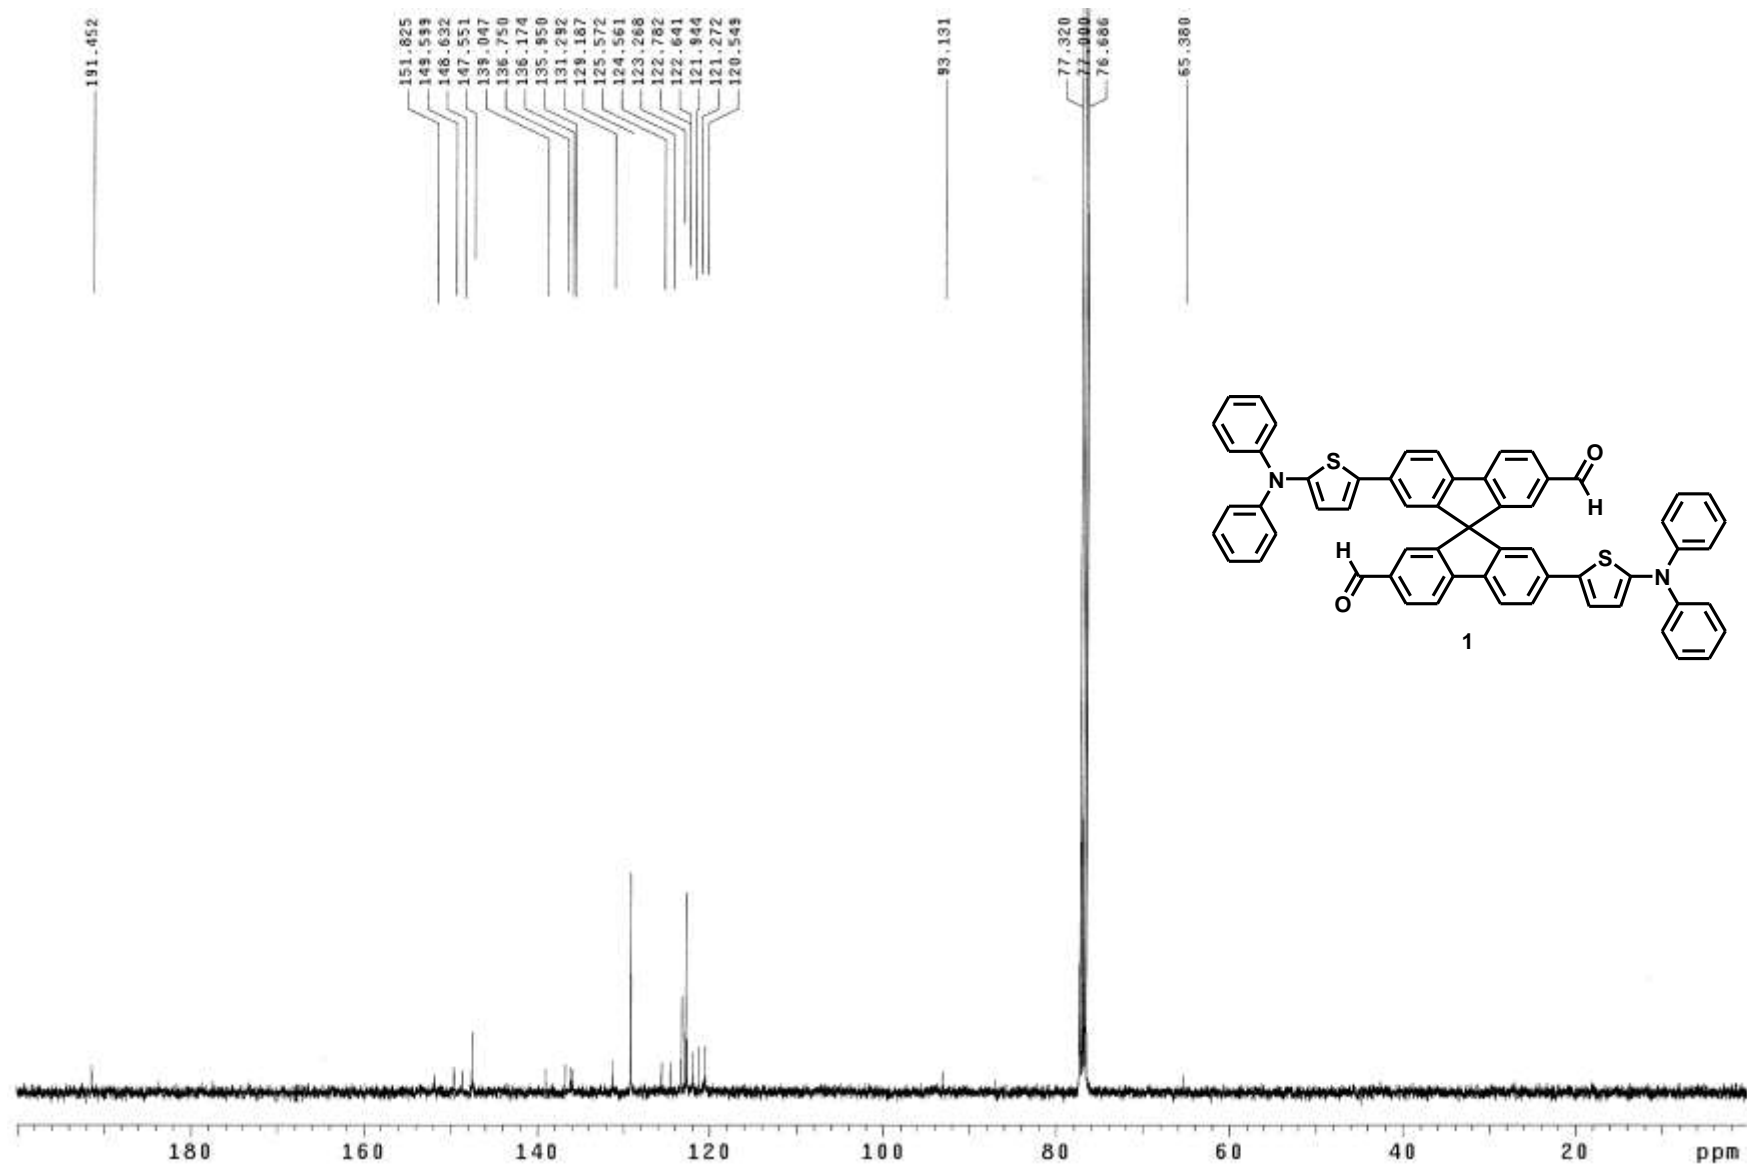

Figure 1b: <sup>13</sup>C NMR Spectrum of precursor compound 1.

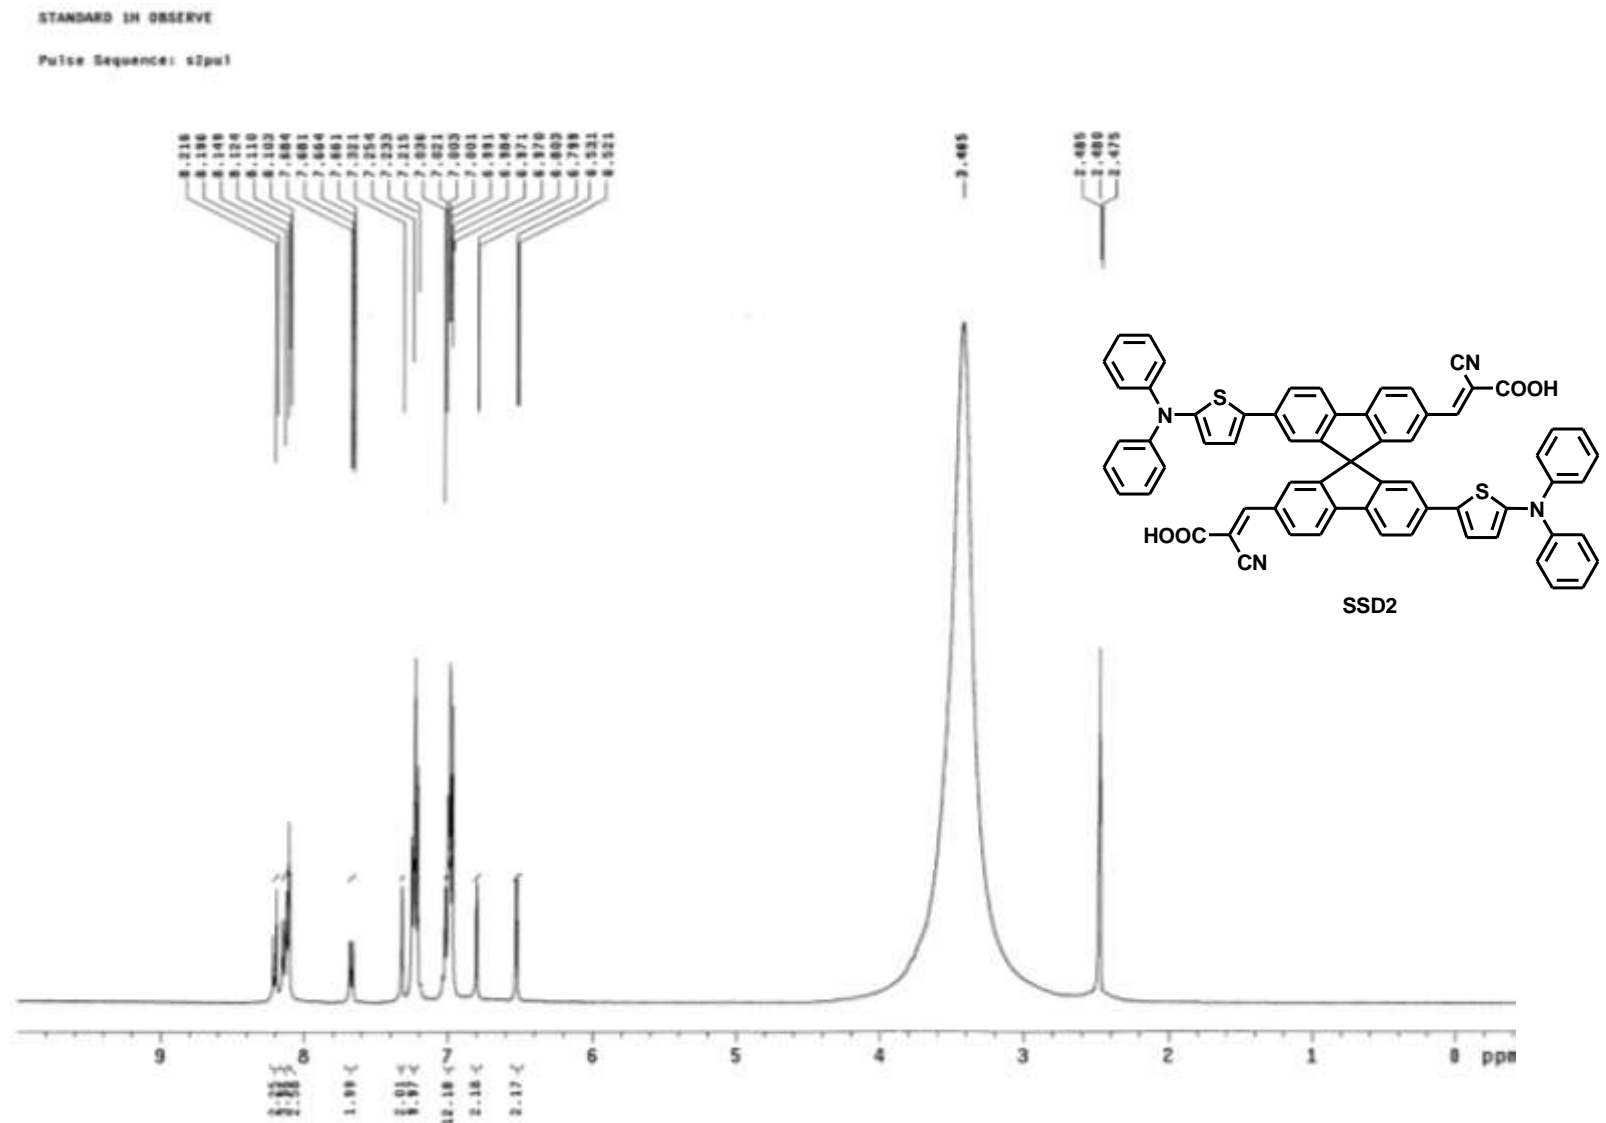

Figure 2a: <sup>1</sup>H NMR Spectrum of SSD2.

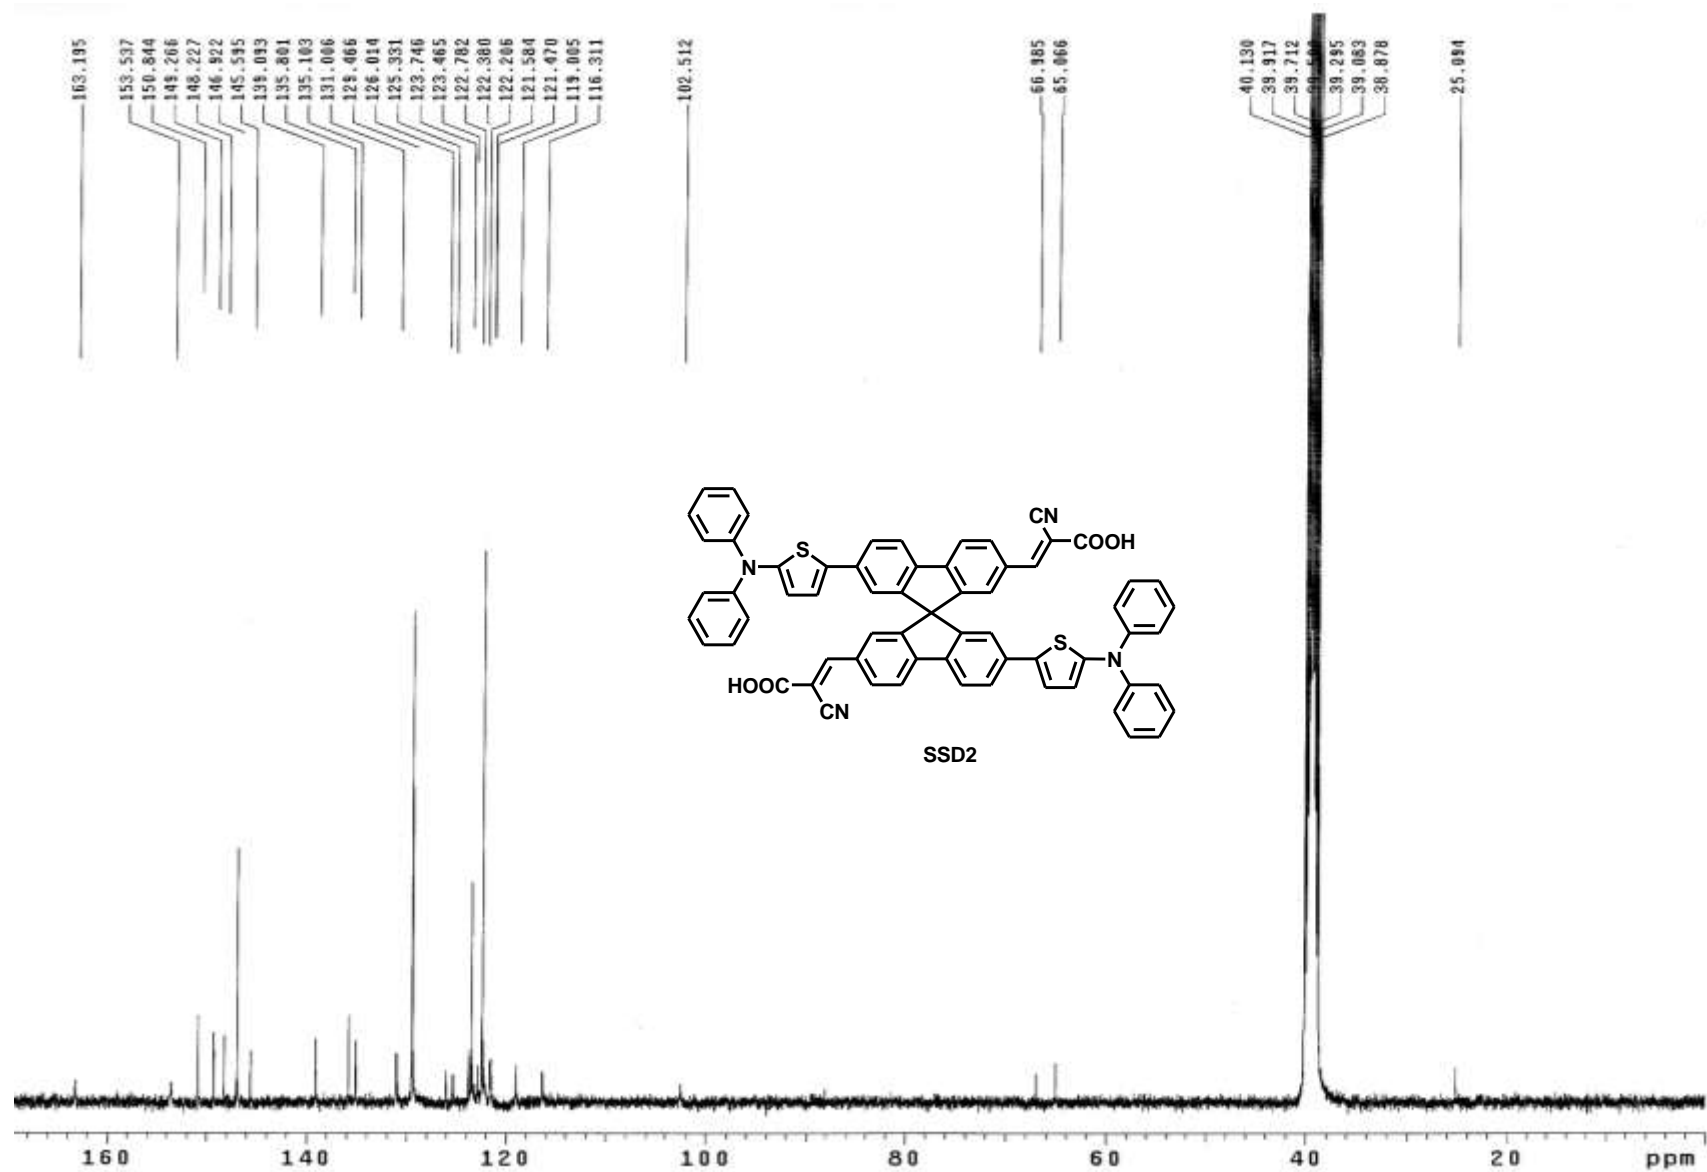

Figure 2b: <sup>13</sup>C NMR Spectrum of SSD2.

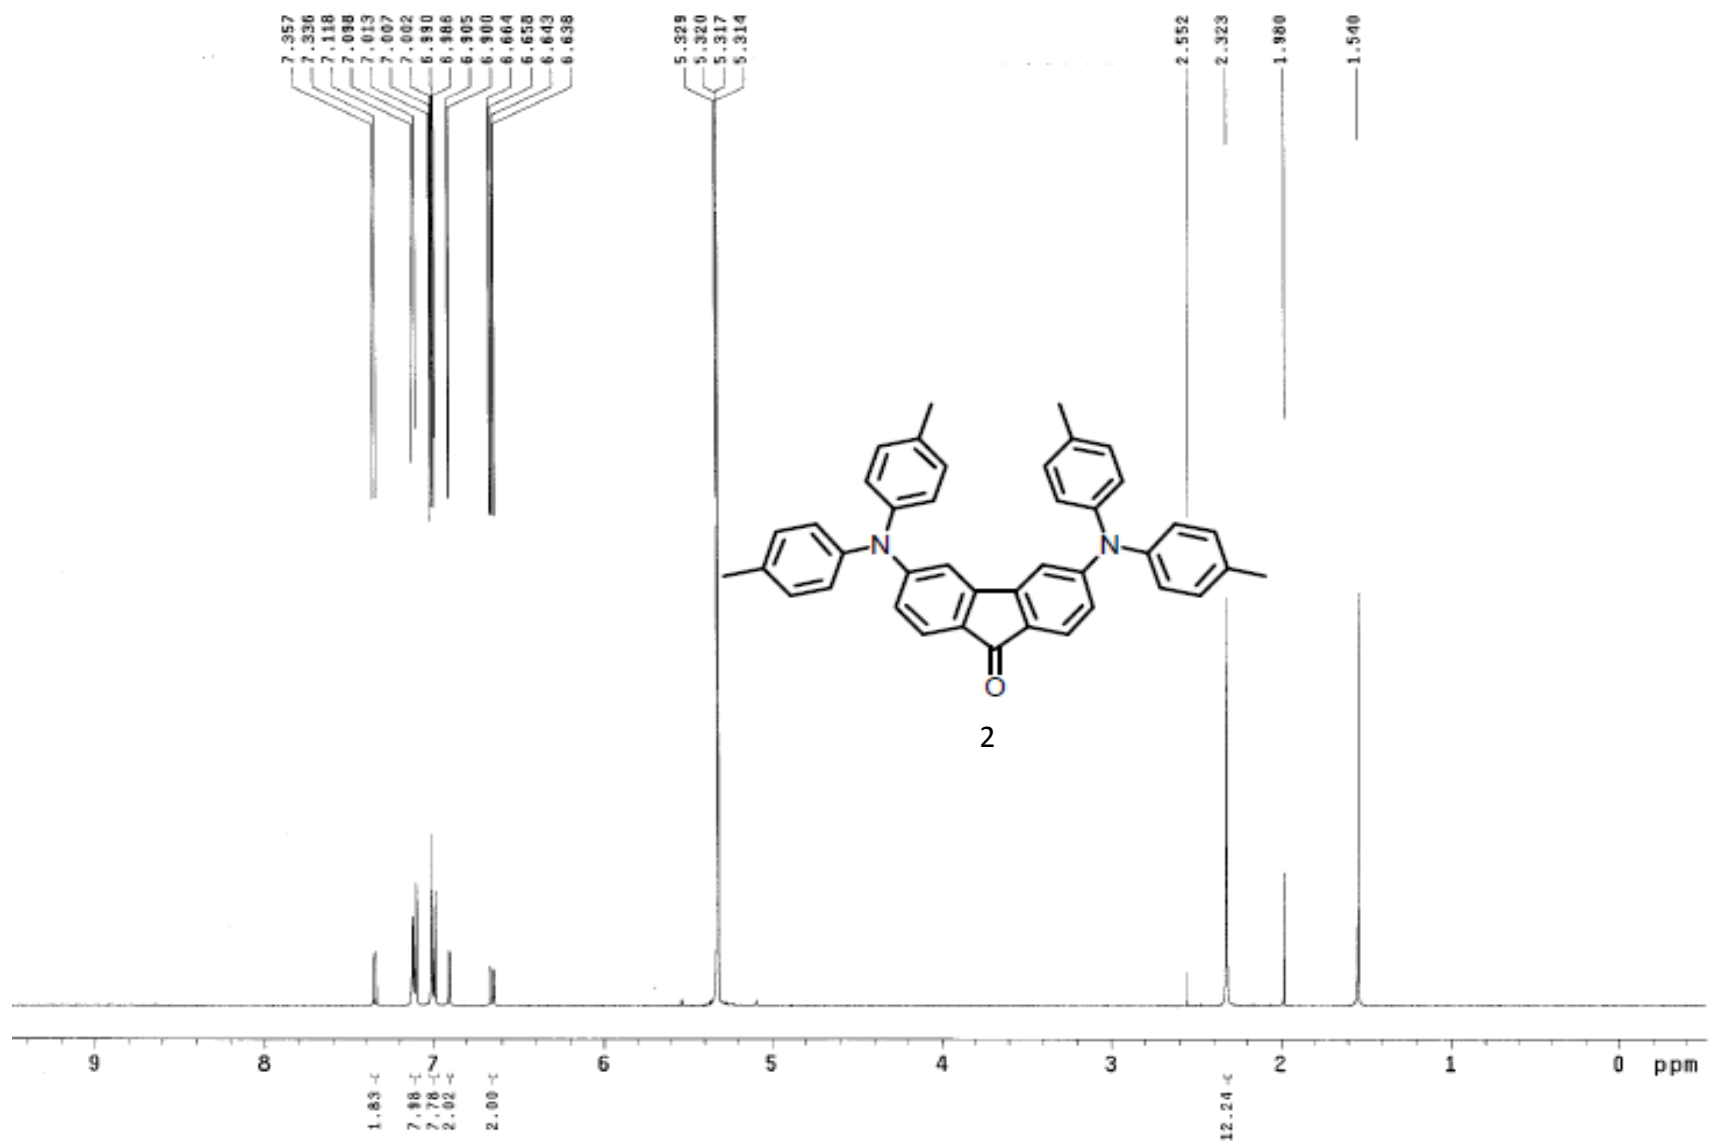

Figure 3a: <sup>1</sup>H NMR Spectrum of precursor compound 2.

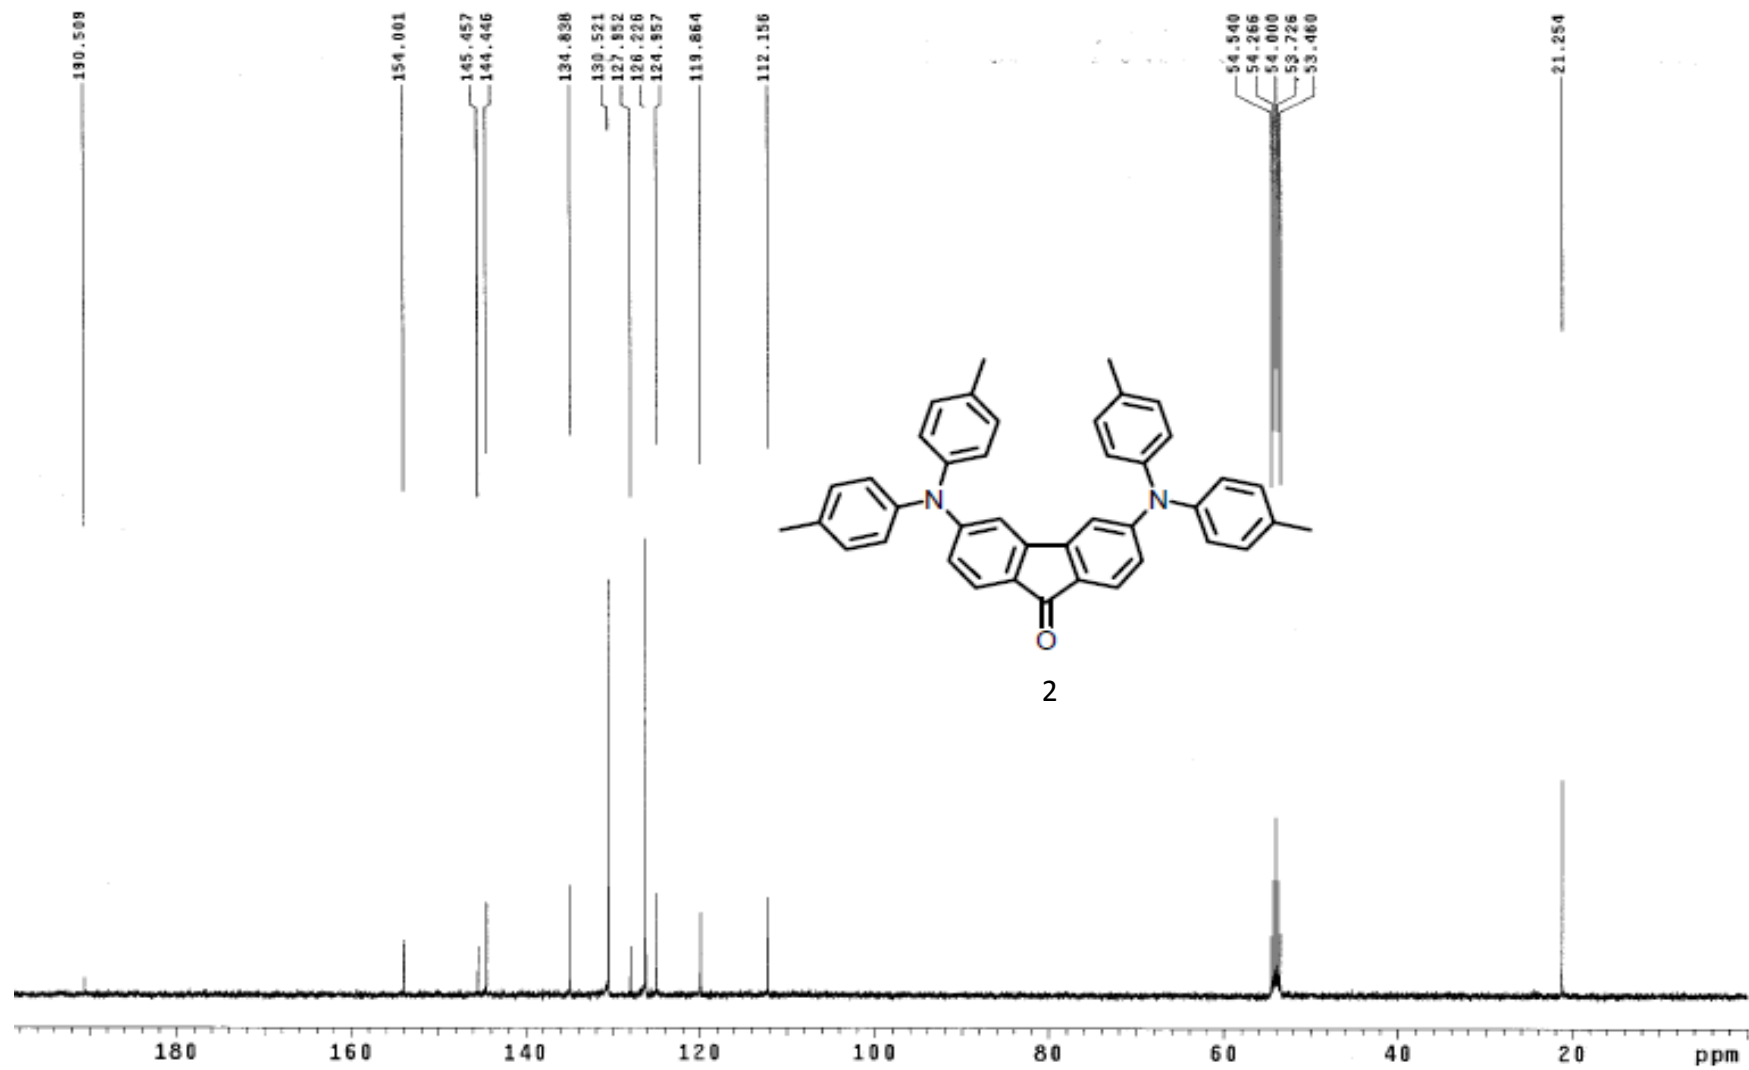

Figure 3b: <sup>13</sup>C NMR Spectrum of precursor compound 2.

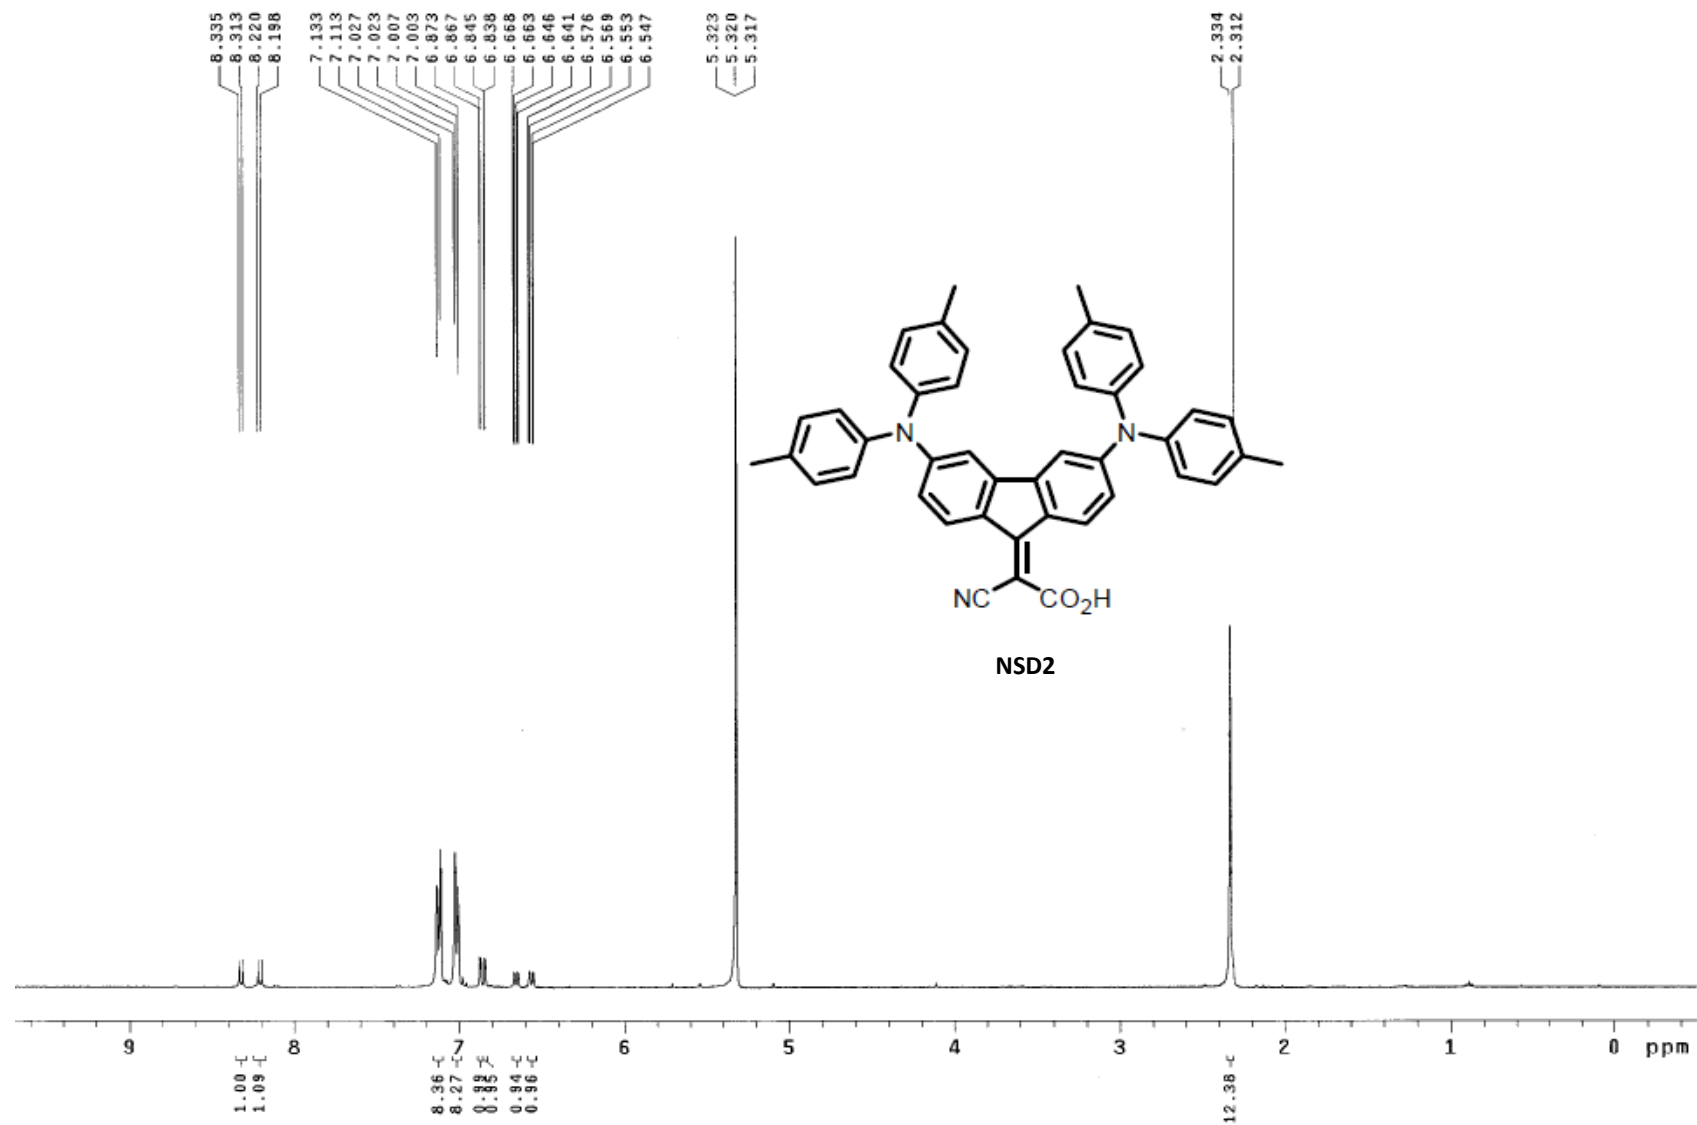

Figure 4a: <sup>1</sup>H NMR Spectrum of NSD2.



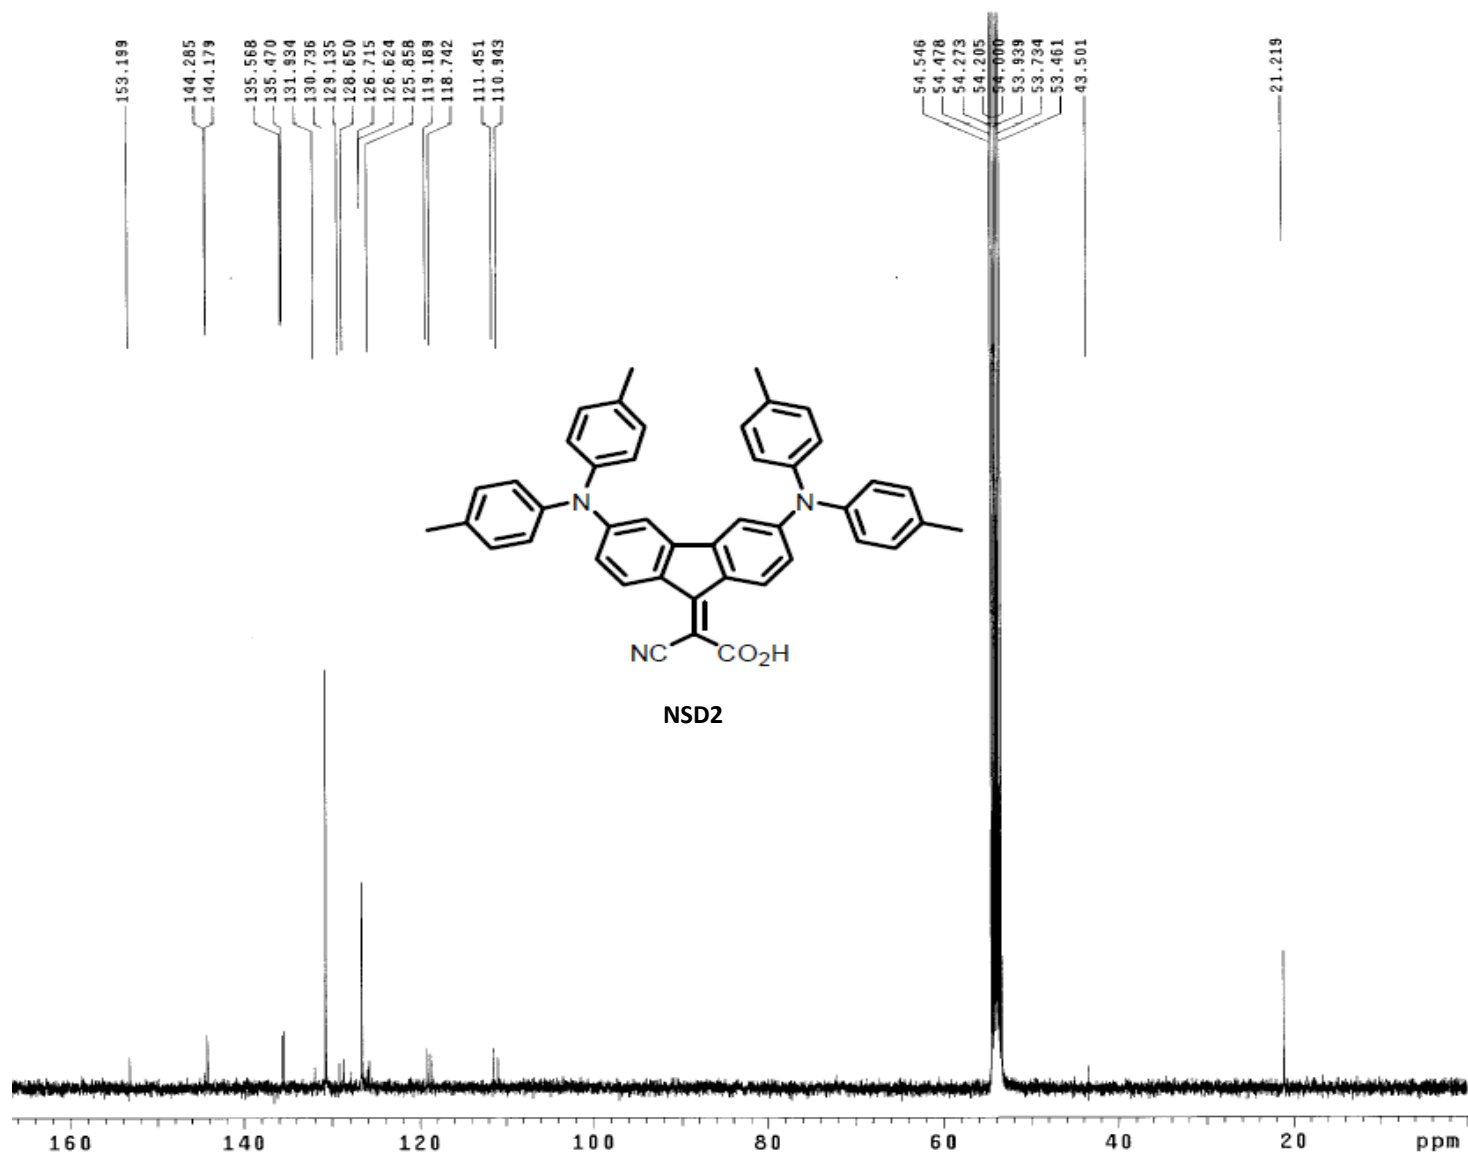

Figure 4b: <sup>13</sup>C NMR Spectrum of NSD2
